# Supplementary material for: Echinometra lucunter molecules reduce Aβ42-induced neurotoxicity in SH-SY5Y neuron-like cells: effects on disaggregation and oxidative stress
Source: PubMed Central journal article supplement (PMC10694836; doi:10.1590/1678-9199-jvatitd-2023-0031), 2023-12-01
Supplement: 1678-9199-jvatitd-29-e20230031-s2.pdf [file 1678-9199-jvatitd-29-e20230031-s2.pdf]

**Supplementary Material to “*Echinometra lucunter* molecules reduce A $\beta$ 42-induced neurotoxicity in SH-SY5Y neuron-like cells: effects on disaggregation and oxidative stress”**

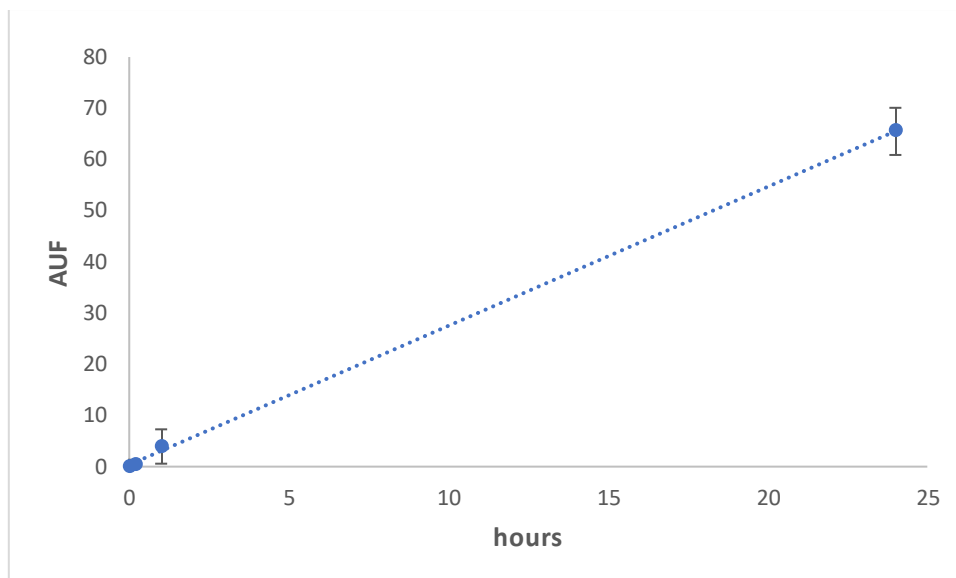

**Additional file 2.** Oligomerization of A $\beta$ 42 peptide after dilution to PBS buffer at 4°C for 24 hours, measured by arbitrary units of fluorescence (AUF) after staining with Thioflavin-T.
