# Supplementary material for: Echinometra lucunter molecules reduce Aβ42-induced neurotoxicity in SH-SY5Y neuron-like cells: effects on disaggregation and oxidative stress
Source: PubMed Central journal article supplement (PMC10694836; doi:10.1590/1678-9199-jvatitd-2023-0031), 2023-12-01
Supplement: 1678-9199-jvatitd-29-e20230031-s3.pdf [file 1678-9199-jvatitd-29-e20230031-s3.pdf]

**Supplementary Material to “*Echinometra lucunter* molecules reduce A $\beta$ 42-induced neurotoxicity in SH-SY5Y neuron-like cells: effects on disaggregation and oxidative stress”**

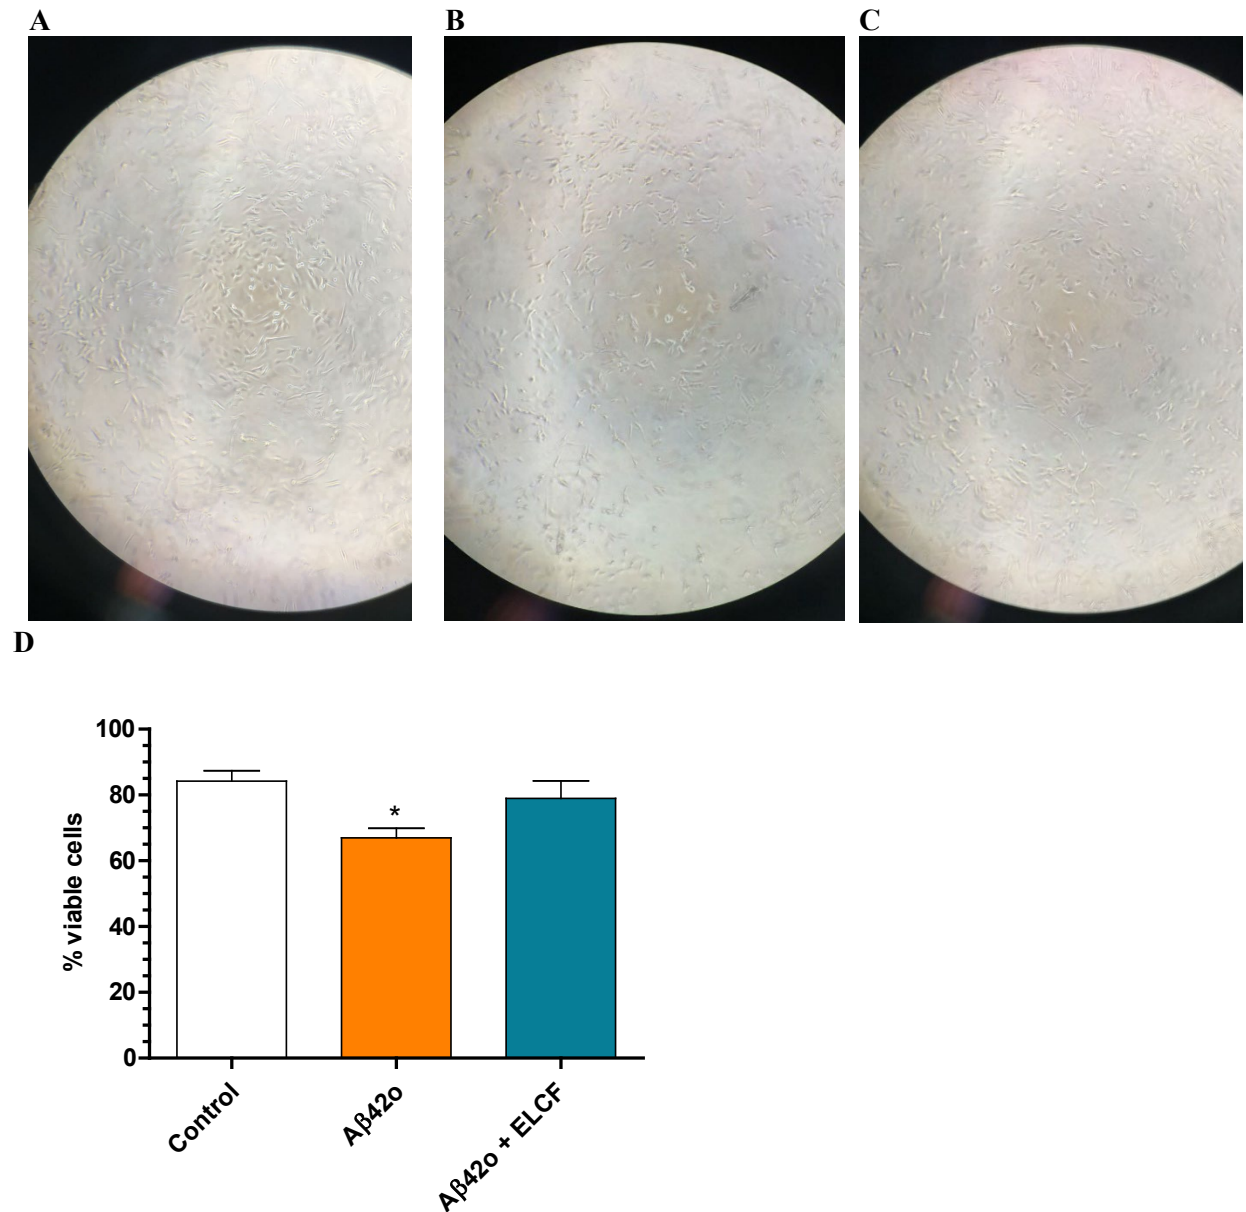

**Additional file 3.** Representative images of differentiated SH-SY5Y cell culture (A) without any treatment, (B) after incubation of 5  $\mu$ M of A $\beta$ 42o and (C) after treatment with ELCF of cells exposed to 48h A $\beta$ 42o. The image suggests a reduction in the number of cells after treatment with both A $\beta$ 42o and ELCF, the number of cells was reduced compared to control. However, in B the morphology of cells is altered, in agreement with the MTT assay. In D, trypan blue staining of cells for counting and determination of viable cells.
