# Supplementary material for: Echinometra lucunter molecules reduce Aβ42-induced neurotoxicity in SH-SY5Y neuron-like cells: effects on disaggregation and oxidative stress
Source: PubMed Central journal article supplement (PMC10694836; doi:10.1590/1678-9199-jvatitd-2023-0031), 2023-12-01
Supplement: 1678-9199-jvatitd-29-e20230031-s4.pdf [file 1678-9199-jvatitd-29-e20230031-s4.pdf]

**Supplementary Material to “*Echinometra lucunter* molecules reduce A $\beta$ 42-induced neurotoxicity in SH-SY5Y neuron-like cells: effects on disaggregation and oxidative stress”**

**A**

**Control**

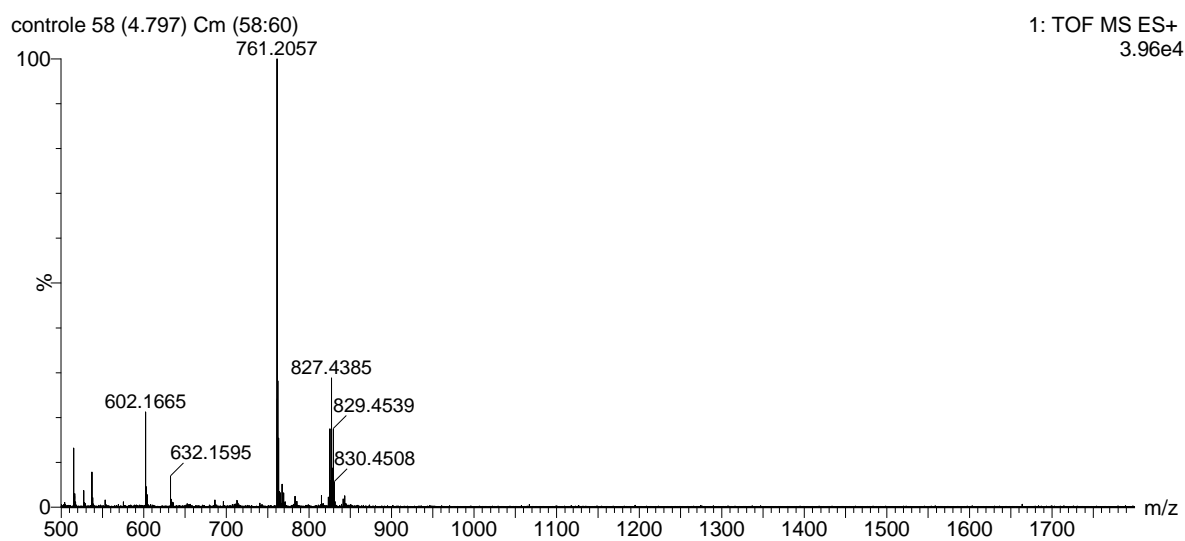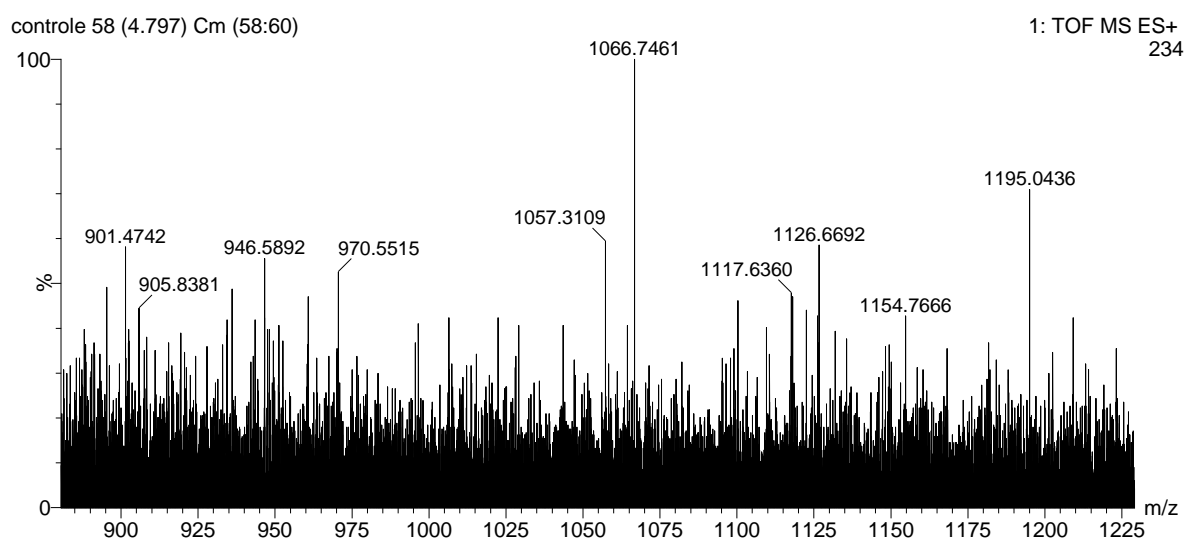

## B

### A $\beta$ 42

padraoB42\_MRM

b42-2 58 (4.914) Cm (57:59)

1: TOF MS ES+  
1.06e6

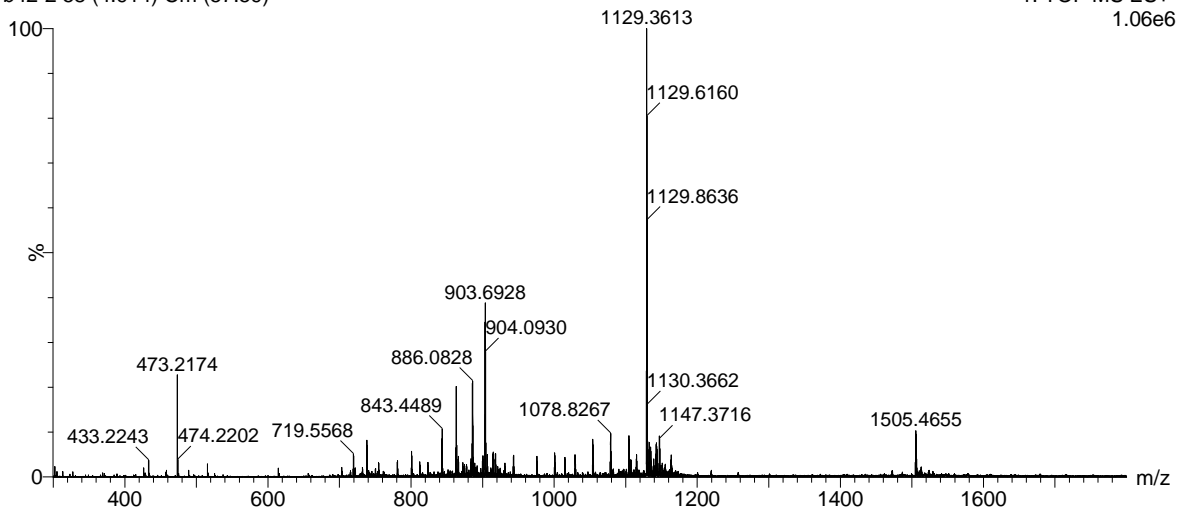

## C

### ELCF – prevention approach

sobren3 58 (4.914) Cm (58)

1: TOF MS ES+  
1.55e5

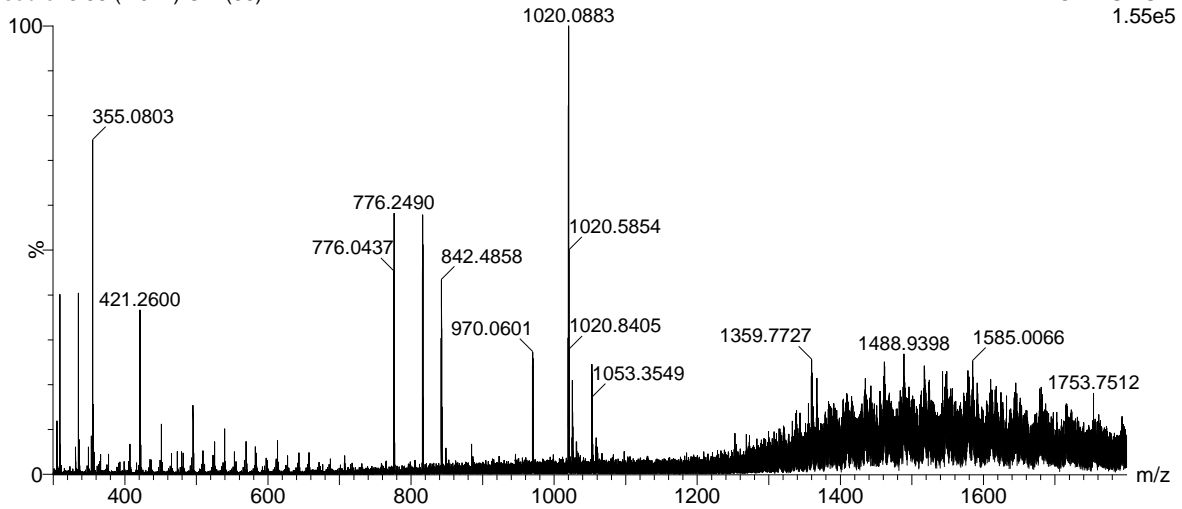

sobren3 58 (4.914) Cm (58)

1: TOF MS ES+  
9.36e3

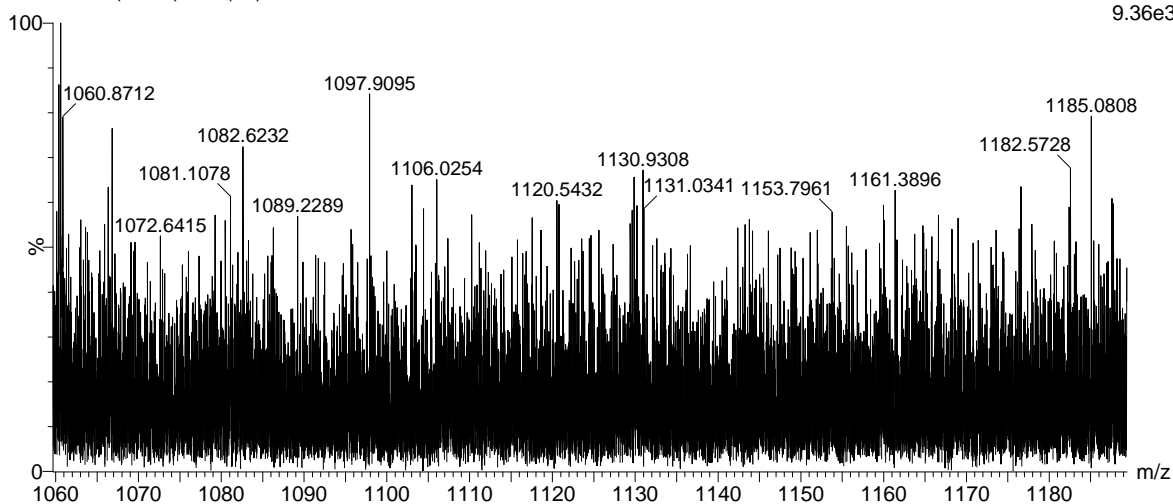

## D

### ELCF – treatment approach

sobren2 58 (4.914) Cm (55:58)

1: TOF MS ES+  
5.55e5

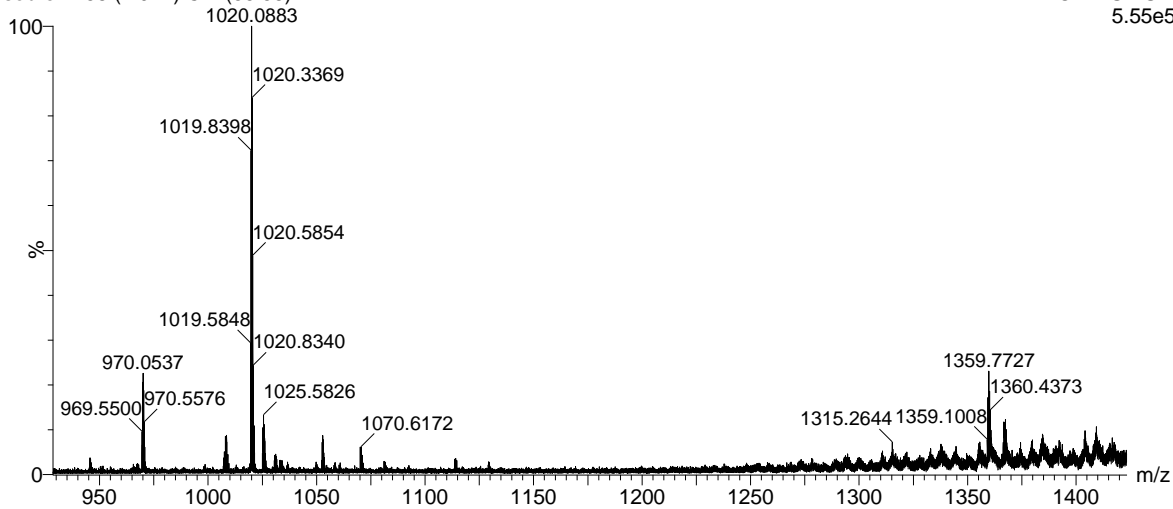

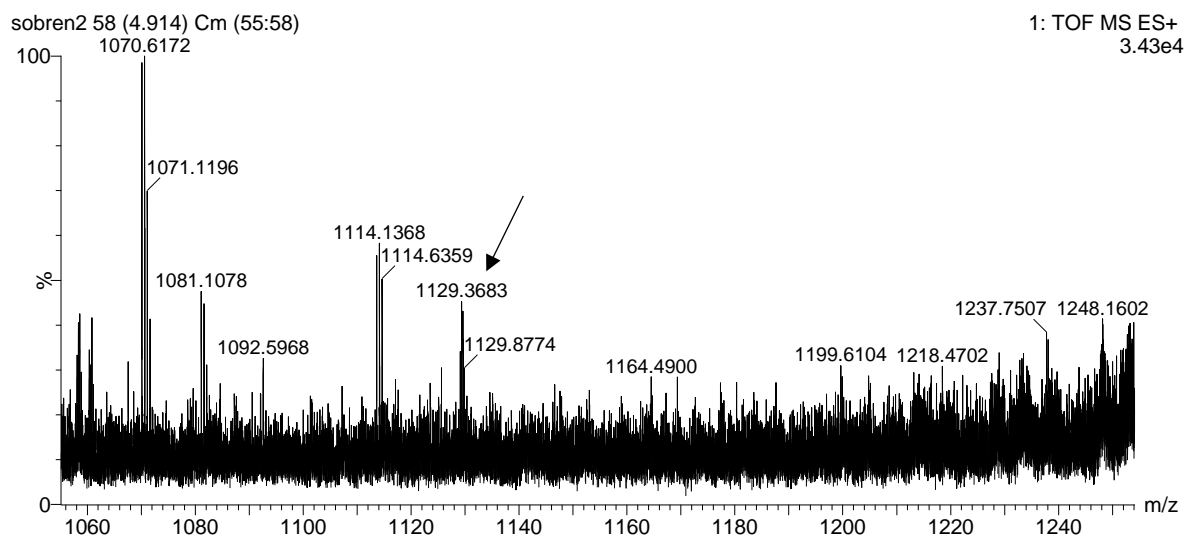

**Additional file 4.** Mass spectra of culture media from SH-SY5Y cell culture. (A) Control, without treatment; (B) cells treated with 5  $\mu$ M A $\beta$ 42o, where is possible to see ions 1129 and 1505 m/z, correspondent to the amyloid peptide; (C) cells treated with ELCF and then 5  $\mu$ M A $\beta$ 42o (prevention approach), where no A $\beta$ 42o ions were detected; (D) cells treated with 5  $\mu$ M A $\beta$ 42o and then ELCF (treatment approach), where is possible to see the ion 1129 m/z (arrow in the zoomed image).
